# Supplementary material
Source: publisher figshare collection journal article supplement (https://gsapubs.figshare.com/ndownloader/files/26885645)
Supplement: Supplementary file 1 [file 26885645]

## Sheet: Sheet1
Table S3. Representative chemical compositions (wt. %) of plagioclase from the paragneisses
Sample	33482			91-41	33482				91-19
Domain	matrix	matrix	matrix	matrix	rim	core	mantle	rim	corona	corona	corona	corona
Spot	17	42	21	70	49	55	60	62	3	4	7	10
SiO2	63.96	64.38	63.5	63.5	63.82	62.49	62.85	63.42	64.03	63.75	62.56	64.05
Al2O3	22.01	22.24	22.41	22.47	22.87	23.25	22.88	22.51	22.6	22.69	22.97	21.89
FeO	0.08	0	0.08	0.06	0.02	0.06	0.02	0.05	0.23	0.15	0.18	0.15
CaO	4.03	4.13	4.07	4.21	4.27	5.24	4.79	4.44	4.31	4.28	4.51	4.25
Na2O	8.65	8.78	9.15	8.63	8.63	8.16	8.16	8.56	8.5	8.55	8.95	8.67
K2O	0.3	0.34	0.34	0.43	0.17	0.16	0.57	0.39	0.14	0.18	0.15	0.26
Total	99.06	99.92	99.66	99.34	99.83	99.42	99.32	99.42	99.87	99.64	99.39	99.3
Si	2.87	2.86	2.82	2.84	2.84	2.8	2.82	2.83	2.85	2.85	2.79	2.87
Al	1.16	1.16	1.17	1.18	1.2	1.23	1.21	1.19	1.19	1.19	1.21	1.15
Fe2+	0	0	0	0	0	0	0	0	0.01	0.01	0.01	0.01
Ca	0.19	0.2	0.19	0.2	0.2	0.25	0.23	0.21	0.21	0.2	0.22	0.2
Na	0.75	0.76	0.79	0.75	0.74	0.71	0.71	0.74	0.73	0.74	0.77	0.75
K	0.02	0.02	0.02	0.02	0.01	0.01	0.03	0.02	0.01	0.01	0.01	0.01
Ab	0.78	0.78	0.79	0.77	0.78	0.73	0.73	0.76	0.77	0.78	0.78	0.77
An	0.2	0.2	0.19	0.21	0.21	0.26	0.24	0.22	0.22	0.21	0.22	0.21
Or	0.02	0.02	0.02	0.03	0.01	0.01	0.03	0.02	0.01	0.01	0.01	0.02
